# Supplementary figures and images for: Redox imbalance induces remodeling of glucose metabolism in Rhipicephalus microplus embryonic cell line
Source: PubMed Central journal article supplement — J Biol Chem. 2022 Jan 19;298(3):101599. doi: 10.1016/j.jbc.2022.101599 (PMC8857477; doi:10.1016/j.jbc.2022.101599), 2022-01-19

**control**

**2 mM**

**4 mM**

**2 h**

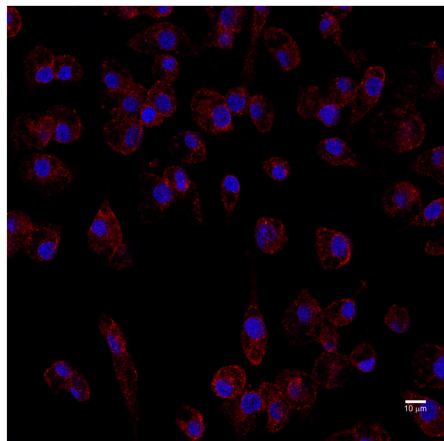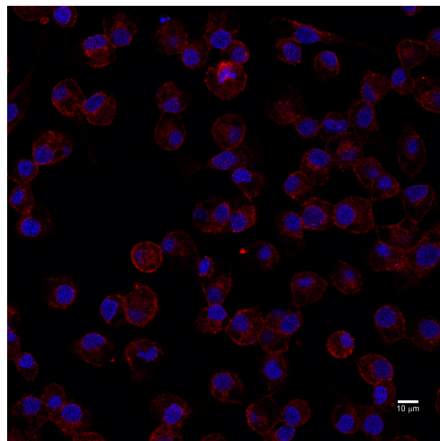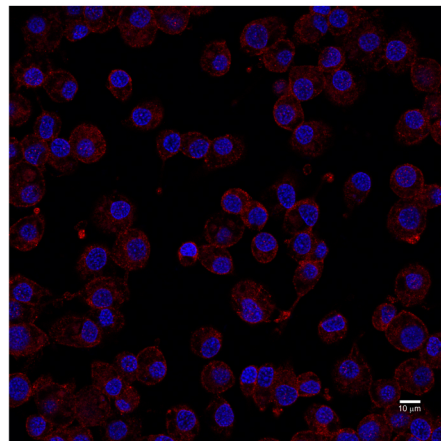

**24 h**

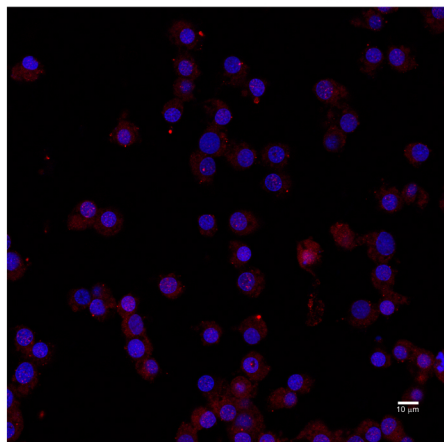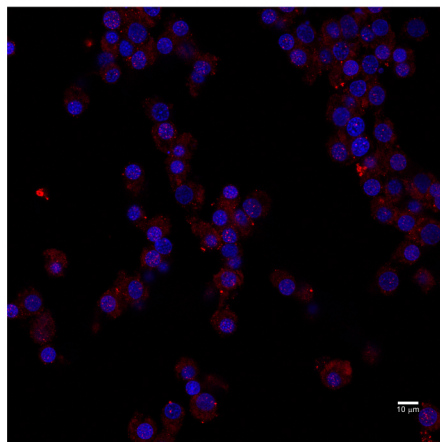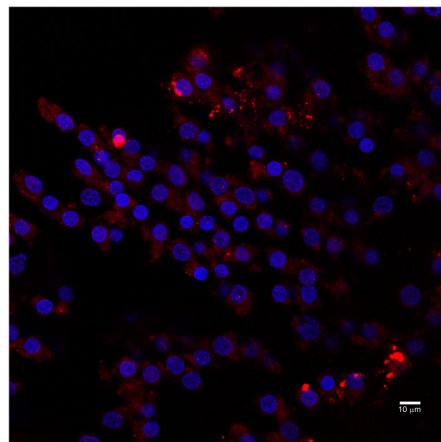

Supplement: mmc1.pdf [file mmc1.pdf]
